# Supplementary material
Source: PubMed Central journal article supplement (PMC11647574)
Supplement: NIHMS2037641-supplement-Supplementary_Data.pdf [file NIHMS2037641-supplement-Supplementary_Data.pdf]

| Characteristic                    | OR   | 95% CI     | p-value      |
|-----------------------------------|------|------------|--------------|
| <b>Gender</b>                     |      |            |              |
| Male                              | —    | —          |              |
| Female                            | 0.63 | 0.50, 0.78 | <0.001       |
| <b>Race</b>                       |      |            |              |
| White                             | —    | —          |              |
| Black                             | 1.17 | 0.93, 1.47 | 0.191        |
| <b>Age at Year 3 Clinic Visit</b> |      |            |              |
| 70-74                             | —    | —          |              |
| 75-79                             | 1.26 | 1.00, 1.61 | 0.055        |
| 80-84                             | 1.63 | 1.12, 2.33 | <b>0.009</b> |
| <b>Education</b>                  |      |            |              |
| Less than High School             | —    | —          |              |
| High School Graduate              | 0.59 | 0.44, 0.80 | <0.001       |
| Post-secondary Schooling          | 0.55 | 0.41, 0.72 | <0.001       |
| <b>Alcohol Consumption</b>        |      |            |              |
| Never                             | —    | —          |              |
| Current                           | 0.92 | 0.71, 1.20 | 0.557        |
| Former                            | 1.29 | 0.94, 1.77 | 0.111        |
| <b>Smoking Status</b>             |      |            |              |
| Never                             | —    | —          |              |
| Former                            | 0.97 | 0.77, 1.22 | 0.774        |
| Current                           | 1.73 | 1.14, 2.58 | <b>0.009</b> |
| <b>Family Income</b>              |      |            |              |
| less than \$10,000                | —    | —          |              |
| \$10,000 to \$25,000              | 0.95 | 0.66, 1.39 | 0.797        |
| > \$25,000 up to \$50,000         | 0.88 | 0.61, 1.29 | 0.513        |
| ≥ \$50,000                        | 0.62 | 0.40, 0.96 | <b>0.031</b> |
| <b>Spirituality/Religion</b>      |      |            |              |
| Not Important                     | —    | —          |              |
| Important                         | 0.61 | 0.37, 1.02 | <b>0.049</b> |
| <b>Site</b>                       |      |            |              |

|                                          |      |            |                  |
|------------------------------------------|------|------------|------------------|
| Memphis                                  | —    | —          |                  |
| Pittsburgh                               | 0.78 | 0.63, 0.98 | <b>0.03</b>      |
| <b>Daytime Sleepiness</b>                | 1.08 | 0.78, 1.48 | 0.64             |
| <b>Depressive Symptoms</b>               | 1.2  | 0.85, 1.68 | 0.285            |
| <b>Anxiety Symptoms</b>                  | 0.79 | 0.62, 1.00 | 0.057            |
| <b>Hit Head Hard Enough to Faint</b>     | 1.28 | 0.89, 1.82 | 0.175            |
| <b>Parkinsons Disease</b>                | 3.95 | 0.93, 16.8 | 0.053            |
| <b>BMI</b>                               |      |            |                  |
| <25                                      | —    | —          |                  |
| 25-29.9                                  | 0.78 | 0.60, 1.00 | 0.05             |
| >30                                      | 0.72 | 0.53, 0.97 | 0.031            |
| <b>Avg sitting systolic BP, z score</b>  | 1.01 | 0.90, 1.12 | 0.926            |
| <b>Avg sitting diastolic BP, z score</b> | 0.95 | 0.85, 1.07 | 0.399            |
| <b>Self-reported Health</b>              |      |            |                  |
| Excellent/Very Good                      | —    | —          |                  |
| Good                                     | 1.27 | 0.99, 1.63 | 0.062            |
| Fair/Poor                                | 1.81 | 1.33, 2.45 | <b>&lt;0.001</b> |
| <b>Cognitive Impairment</b>              | 3.11 | 2.21, 4.35 | <b>&lt;0.001</b> |
| <b>Pneumonia, preceding 6 months</b>     | 1.57 | 0.43, 4.73 | 0.445            |
| <b>MI/Heart Disease</b>                  | 1.33 | 1.02, 1.71 | <b>0.03</b>      |
| <b>Cerebrovascular Disease</b>           | 1.23 | 0.83, 1.77 | 0.289            |
| <b>Hypertension</b>                      | 1.05 | 0.84, 1.32 | 0.643            |
| <b>Diabetes Mellitus</b>                 | 1.1  | 0.82, 1.47 | 0.521            |

**SUPPLEMENTARY TABLE 1:** Univariable logistic regression analysis of variables associated with hyposmia (CC-SIT SCORE = 7 or 8) compared to good olfaction (CC-SIT SCORE  $\geq$  9). OR = Odds Ratio, CI = Confidence Interval

Hyposmia - Odds Ratio (95% Confidence Interval), *p* value

| Characteristic              | Model 1                                        | Model 2                                        | Model 3                                        | Model 4                                        | Model 5                                        |
|-----------------------------|------------------------------------------------|------------------------------------------------|------------------------------------------------|------------------------------------------------|------------------------------------------------|
| <b>Gender</b>               |                                                |                                                |                                                |                                                |                                                |
| Male                        | —                                              | —                                              | —                                              | —                                              | —                                              |
| Female                      | 0.61 (0.49, 0.77), <math>\mathbf{0.001}</math> | 0.62 (0.49, 0.78), <math>\mathbf{0.001}</math> | 0.59 (0.46, 0.74), <math>\mathbf{0.001}</math> | 0.56 (0.44, 0.72), <math>\mathbf{0.001}</math> | 0.51 (0.41, 0.63), <math>\mathbf{0.001}</math> |
| <b>Race</b>                 |                                                |                                                |                                                |                                                |                                                |
| White                       | —                                              | —                                              | —                                              | —                                              | —                                              |
| Black                       | 1.27 (1.01, 1.61), <math>\mathbf{0.044}</math> | 1.08 (0.84, 1.38), 0.564                       | 1.02 (0.78, 1.32), 0.907                       | 0.96 (0.73, 1.25), 0.765                       | 1.04 (0.82, 1.32), 0.753                       |
| <b>Age</b>                  |                                                |                                                |                                                |                                                |                                                |
| 70-74                       | —                                              | —                                              | —                                              | —                                              | —                                              |
| 75-79                       | 1.26 (0.99, 1.60), 0.063                       | 1.27 (1.00, 1.62), <math>\mathbf{0.050}</math> | 1.27 (1.00, 1.62), 0.053                       | 1.28 (1.00, 1.63), <math>\mathbf{0.047}</math> | 1.35 (1.10, 1.66), <math>\mathbf{0.005}</math> |
| 80-84                       | 1.65 (1.13, 2.37), <math>\mathbf{0.008}</math> | 1.68 (1.15, 2.42), <math>\mathbf{0.006}</math> | 1.68 (1.15, 2.43), <math>\mathbf{0.006}</math> | 1.70 (1.16, 2.45), <math>\mathbf{0.006}</math> | 1.99 (1.45, 2.72), <math>\mathbf{0.001}</math> |
| <b>Education</b>            |                                                |                                                |                                                |                                                |                                                |
| Less than High School       | —                                              | —                                              | —                                              | —                                              | —                                              |
| High School Graduate        | —                                              | 0.62 (0.46, 0.84), 0.002                       | 0.63 (0.46, 0.86), 0.003                       | 0.62 (0.45, 0.85), 0.003                       | 0.83 (0.62, 1.10), 0.186                       |
| Some college                | —                                              | 0.54 (0.40, 0.73), <math>\mathbf{0.001}</math> | 0.60 (0.43, 0.83), <math>\mathbf{0.002}</math> | 0.61 (0.44, 0.84), <math>\mathbf{0.003}</math> | 0.84 (0.62, 1.13), 0.240                       |
| <b>Family Income</b>        |                                                |                                                |                                                |                                                |                                                |
| less than \$10,000          | —                                              | —                                              | —                                              | —                                              | —                                              |
| \$10,000 to \$25,000        | —                                              | —                                              | 0.96 (0.65, 1.43), 0.821                       | 0.97 (0.66, 1.45), 0.886                       | 0.86 (0.63, 1.20), 0.382                       |
| \$25,000 to \$50,000        | —                                              | —                                              | 0.94 (0.61, 1.45), 0.767                       | 0.96 (0.63, 1.49), 0.853                       | 0.86 (0.60, 1.23), 0.396                       |
| ≥ \$50,000                  | —                                              | —                                              | 0.63 (0.38, 1.05), 0.073                       | 0.66 (0.40, 1.12), 0.121                       | 0.64 (0.42, 0.97), <math>\mathbf{0.037}</math> |
| <b>Alcohol Consumption</b>  |                                                |                                                |                                                |                                                |                                                |
| Never                       | —                                              | —                                              | —                                              | —                                              | —                                              |
| Current                     | —                                              | —                                              | —                                              | 0.94 (0.71, 1.26), 0.684                       | 1.03 (0.80, 1.32), 0.827                       |
| Former                      | —                                              | —                                              | —                                              | 1.17 (0.83, 1.64), 0.362                       | 1.25 (0.93, 1.67), 0.140                       |
| <b>Smoking Status</b>       |                                                |                                                |                                                |                                                |                                                |
| Never                       | —                                              | —                                              | —                                              | —                                              | —                                              |
| Former                      | —                                              | —                                              | —                                              | 0.80 (0.62, 1.04), 0.096                       | 0.90 (0.73, 1.12), 0.363                       |
| Current                     | —                                              | —                                              | —                                              | 1.55 (1.00, 2.37), <math>\mathbf{0.046}</math> | 1.32 (0.90, 1.93), 0.156                       |
| <b>Site</b>                 |                                                |                                                |                                                |                                                |                                                |
| Memphis                     | —                                              | —                                              | —                                              | —                                              | —                                              |
| Pittsburgh                  | —                                              | —                                              | —                                              | —                                              | 0.96 (0.78, 1.17), 0.655                       |
| <b>BMI</b>                  |                                                |                                                |                                                |                                                |                                                |
| <25                         | —                                              | —                                              | —                                              | —                                              | —                                              |
| 25-29.9                     | —                                              | —                                              | —                                              | —                                              | 0.82 (0.66, 1.03), 0.085                       |
| >30                         | —                                              | —                                              | —                                              | —                                              | 0.74 (0.56, 0.96), <math>\mathbf{0.025}</math> |
| <b>Systolic BP</b>          |                                                |                                                |                                                |                                                |                                                |
| 0.96 (0.86, 1.08), 0.522    |                                                |                                                |                                                |                                                |                                                |
| <b>Diastolic BP</b>         |                                                |                                                |                                                |                                                |                                                |
| 1.04 (0.93, 1.16), 0.473    |                                                |                                                |                                                |                                                |                                                |
| <b>Self-reported Health</b> |                                                |                                                |                                                |                                                |                                                |

|                                |                                    |
|--------------------------------|------------------------------------|
| Excellent/Very Good            |                                    |
| Good                           | 1.20 (0.97, 1.49), 0.100           |
| Fair/Poor                      | 1.58 (1.18, 2.11), <b>0.002</b>    |
| <b>Depressive Symptoms</b>     | 0.98 (0.70, 1.35), 0.890           |
| <b>Anxiety Symptoms</b>        | 0.79 (0.63, 0.99), <b>0.041</b>    |
| <b>Hit Head Hard</b>           | 1.18 (0.85, 1.62), 0.312           |
| <b>Parkinson's Disease</b>     | 4.33 (1.30, 16.8), <b>0.021</b>    |
| <b>Cognitive Impairment</b>    | 2.96 (2.14, 4.11), <b>&lt;.001</b> |
| <b>Hypertension</b>            | 0.95 (0.77, 1.17), 0.620           |
| <b>Cerebrovascular Disease</b> | 0.99 (0.70, 1.39), 0.950           |

**Supplementary Table 2:** Multivariable logistic regression models of variables associated with hyposmia (CC-SIT Score 7 or 8) compared to good olfaction (CC-SIT score  $\geq 9$ ). Model 1: Gender + race + age; Model 2: Model 1 + education; Model 3: Model 2 + socioeconomic status; Model 4: Model 3 + lifestyle/behavioral factors; Model 5: Model 4 + comorbidities. OR = Odds Ratio, CI = Confidence Interval
